# Supplementary material for: Atmospheric Black Carbon in the metropolitan area of La Paz and El Alto, Bolivia: concentration levels and emission sources
Source: Copernicus journal article supplement (doi:10.5194/egusphere-2024-770), 2024-04-08
Supplement: Supplementary file 1 [file egusphere-2024-770-supplement.pdf]

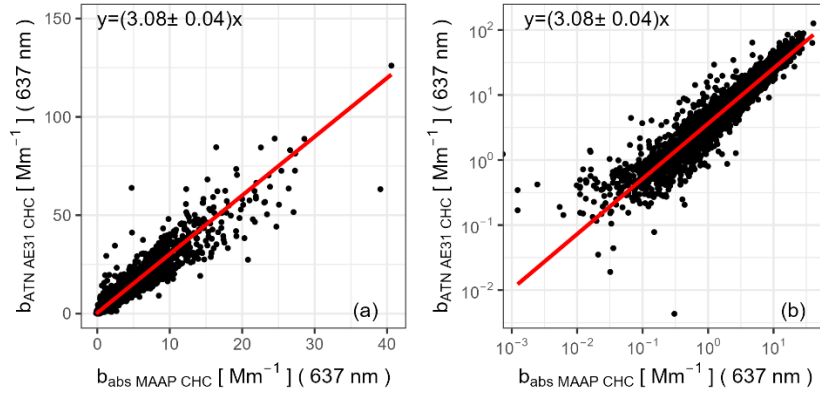

**Figure S1.** Scatterplot of  $b_{ATN\_AE31\_CHC}(637\text{ nm})$  vs.  $b_{abs\_MAAP}(637\text{ nm})$  measured between 10 and 16 hours at CHC-GAW between April 2016 and July 2018 in (a) regular and (b) logarithmic scale. The red line represents the Deming fitting line described in the equation displayed on the top-left.

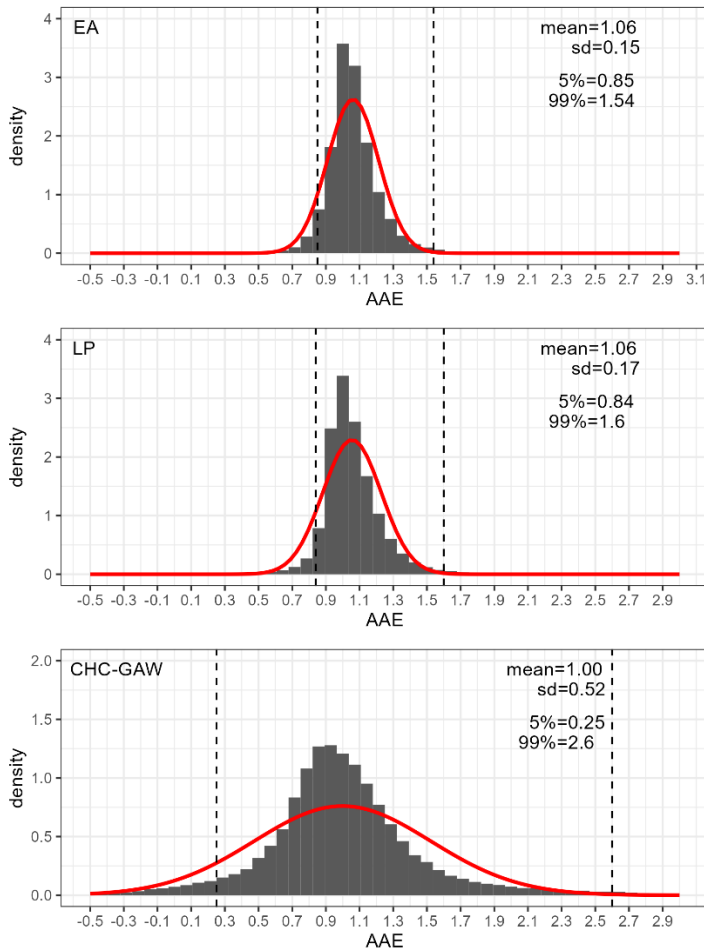

**Figure S2.** Density distribution of the calculated AAE at the three sampling sites at a 5-min resolution. Red lines represent the fitted normal function and the dashed vertical lines represent the 5% and 99% quintiles. The edges of the density distribution beyond the range  $[-0.5, 3]$  were cut for visual purposes.

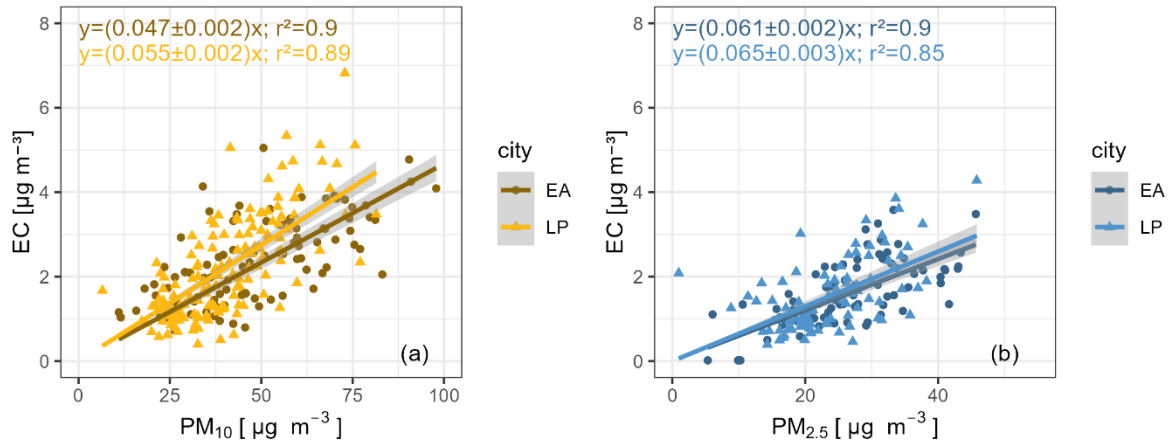

**Figure S3.** Scatter plot of daily average BC concentrations vs  $PM_{10}$  (left panel) and  $PM_{2.5}$  concentrations at both sites (right panel). San Juan episodes (June 23-25) were excluded.

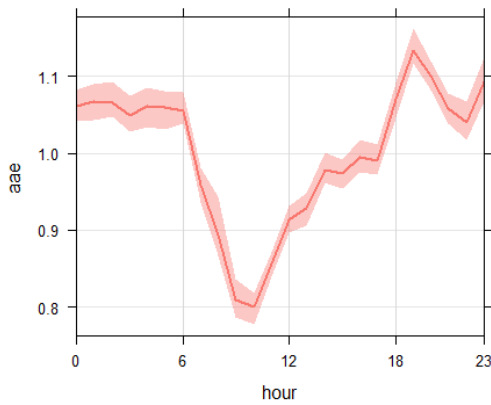

**Figure S4.** Diurnal variability of AAE in CHC-GAW during the studied period (2016-2018)

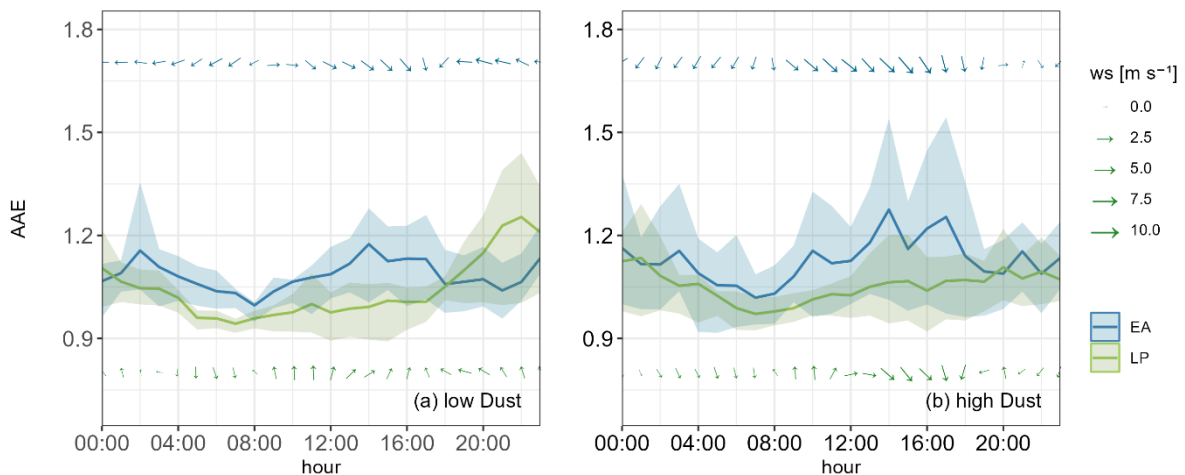

**Figure S5.** Average diurnal variation of the AAE (solid lines), wind speed and wind direction (arrows above and below the solid lines, the arrowhead points to the direction to which the wind blows) at both sites during (a) low dust episodes and (b) high dust episodes taken place during the dry season. The shaded area behind the solid curves represents the 95% CI. A low dust episode is considered a day in which the contribution of the dust factor obtained from the source apportionment presented by Mardoñez et al. (2023) is below the percentile 25, per city. Inversely, a high dust episode is defined as the day when the dust contribution exceeded the percentile 75. It can be observed that as expected, High dust events are characterized by higher wind speeds compared to low dust episodes.

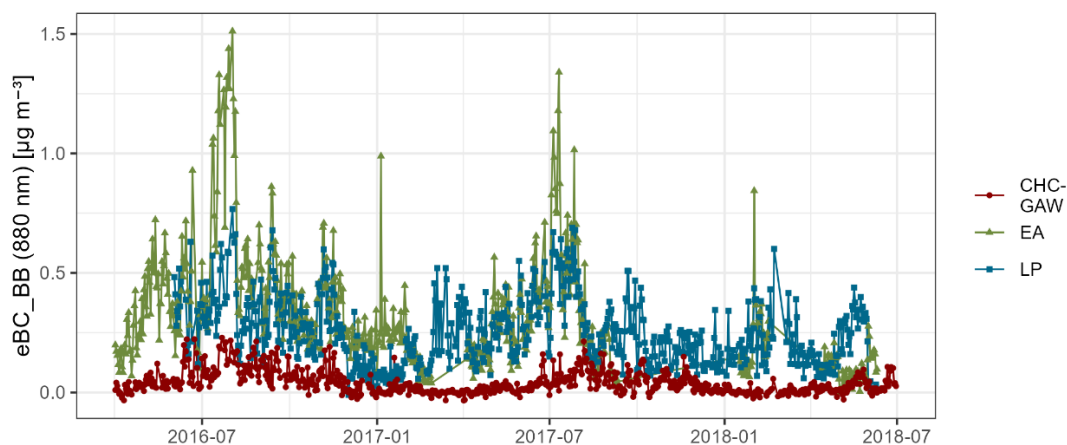

Figure S6. Time series of the  $BC_{BB}$  estimated through the Aethalometer method

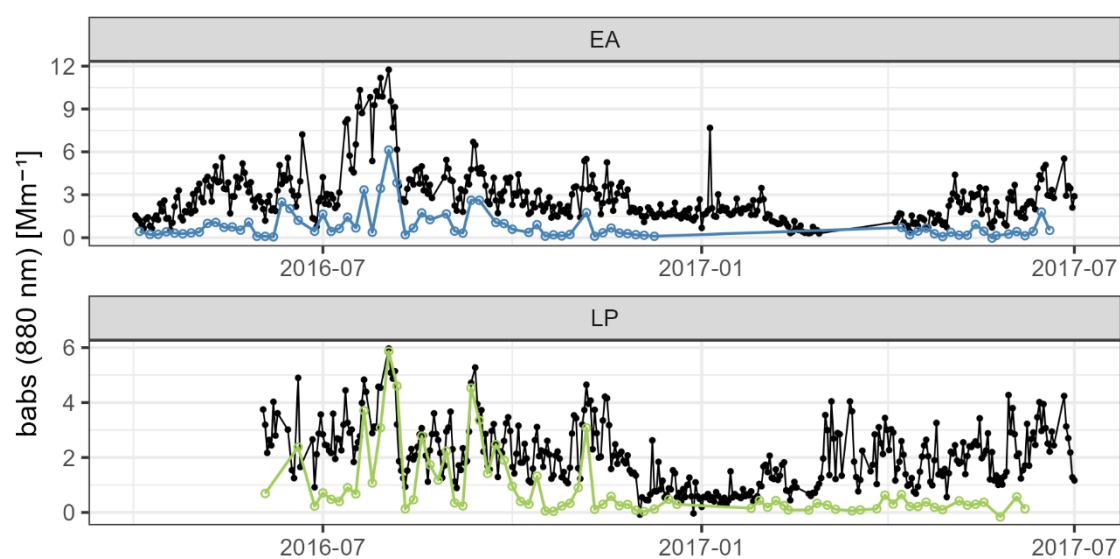

Figure S7. Timeseries of the contribution of agricultural biomass burning to the absorption coefficients measured at the two urban background sites (LP and EA) using two different apportioning methods: Aethalometer method (black lines, with  $AAE_{TR}=0.85$  and  $AAE_{BB}=1.57$ ) and MLR deconvolution from the mass contribution of  $PM_{10}$  sources resolved by Mardoñez et al. (2023) (colored lines).

Table S1. BC vs EC least square linear regression coefficients and their corresponding spearman correlation coefficients

|                    | Intercept<br>[ $g\ m^{-3}$ ] | Slope | $r$ (spearman) |
|--------------------|------------------------------|-------|----------------|
| EA_ $PM_{10}$      | 0.31                         | 0.54  | 0.80           |
| EA_ $PM_{2.5}$     | 0.32                         | 0.54  | 0.70           |
| LP_ $PM_{10}$      | 0.15                         | 0.47  | 0.90           |
| LP_ $PM_{2.5}$     | 0.21                         | 0.49  | 0.93           |
| CHC-GAW_ $PM_{10}$ | 0.07                         | 1.7   | 0.77           |

**Table S2. Median MACEC and MACrBC calculated following eq. [3] using EC and rBC mass concentrations measured at the three sampling sites. The MAC values were extrapolated to other commonly reported wavelengths using the corresponding daily mean AAEs (with average values of  $1.1\pm 0.2$  in the urban area and  $1.0\pm 0.3$  in CHC-GAW).**

| BC mass                                             |                                          | $\lambda$<br>[nm] | CHC-GAW <sup>i</sup><br>Nighttime<br>(23h-8h) | CHC-GAW<br>Daytime<br>(10h-16h) | EA      | LP                     |
|-----------------------------------------------------|------------------------------------------|-------------------|-----------------------------------------------|---------------------------------|---------|------------------------|
| <i>EC-PM<sub>10</sub></i>                           | MAC <sub>EC</sub>                        | 550 nm            | 24.1±10.8                                     | ---                             | 9.1±3.0 | 6.9±1.7                |
|                                                     | ±                                        | 637 nm            | 19.7±9.3                                      | ---                             | 7.8±2.5 | 6.1±1.7                |
|                                                     | IQR<br>[m <sup>2</sup> g <sup>-1</sup> ] | 880 nm            | 14.0±6.9                                      | ---                             | 5.3±1.8 | 4.1±1.0                |
| <i>EC-PM<sub>2.5</sub></i>                          | MAC <sub>EC</sub>                        | 550 nm            | ---                                           | ---                             | 8.6±2.7 | 8.5±1.9                |
|                                                     | ±                                        | 637 nm            | ---                                           | ---                             | 7.7±2.0 | 7.5±1.7                |
|                                                     | IQR<br>[m <sup>2</sup> g <sup>-1</sup> ] | 880 nm            | ---                                           | ---                             | 5.5±1.4 | 5.0±1.1                |
| <i>SP2-XR</i><br>( <i>SP2-XX in</i><br><i>CHC</i> ) | MAC <sub>rBC</sub>                       | 550 nm            | 26.3±8.7                                      | 21.8±5.2                        | 8.6±2.2 | 10.7±6.0 <sup>ii</sup> |
|                                                     | ±                                        | 637 nm            | 22.7±7.5                                      | 18.8±4.5                        | 7.8±2.1 | 9.5±5.4 <sup>ii</sup>  |
|                                                     | IQR<br>[m <sup>2</sup> g <sup>-1</sup> ] | 880 nm            | 16.4±5.4                                      | 13.6±3.3                        | 5.6±1.4 | 6.7±3.3 <sup>ii</sup>  |

<sup>i</sup> MACEC in CHC-GAW are calculated only during night-time periods (23:00-8:00), when the station is outside the influence of the urban mixing layer. MACrBC in CHC-GAW calculated during the times the station is under the influence of the urban mixing layer (10:00-16:00) between April and May 2018.

## References

Mardoñez, V., Pandolfi, M., Borlaza, L. J. S., Jaffrezo, J., Alastuey, A., Besombes, J., Moreno R., I., Perez, N., Močnik, G., Ginot, P., Krejci, R., Chrastny, V., Wiedensohler, A., Laj, P., Andrade, M., and Uzu, G.: Source apportionment study on particulate air pollution in two high-altitude Bolivian cities: La Paz and El Alto, Atmos. Chem. Phys., 23, 10325–10347, <https://doi.org/10.5194/acp-23-10325-2023>, 2023.
